# Supplementary material
Source: HighWire-hosted journal article supplement (https://bmjophth.bmj.com/content/5/1/e000538)
Supplement: inline-supplementary-material-1 [file inline-supplementary-material-1.xlsx]

## Sheet: IOP 
R 0 min	R 15 min	R 30 min	R 60 min	R 120 min	R 180 min	R 360 min	L 0 min	L 15 min	L 30 min	L 60 min	L 120 min	L 180 min	L 360min
12.2	13	8.9	12.9	10.1	10.8	9.8	12.3	12.5	10	10.5	11.1	9.4	11.1
12.3	14.2	12.5	12.4	11.2	11.6	11.1	12.6	13.2	11.3	9.4	10.1	10	10.9
13.4	13.2	14.2	14.4	16.5	12.9	15.2	13.9	14.3	13.2	13.5	16.8	16.8	14.4
15.3	15	13.5	14.2	13.2	14.8	14.8	14.5	15.3	11.6	11.9	13.6	14.7	15.3
14.3	17.1	13.9	14.1	14.2	18	12.6	13.8	11.6	13.5	10.8	16	13.9	11.7
13.3	12.7	13.45	14.1	12.3	11.6	10.3	13.7	14.9	14	14.7	12.3	11.5	12.9
15	14	13.1	13.8	13.7	13.9	16.2	16.2	17.2	13.2	12.9	13.5	13.3	15.2
12.7	9.8	9.9	7.9	10.1	11.6	9	10.7	11.3	8.3	9.9	8.5	9.8	9.8
15.2	15.6	16.2	15.5	16.9	11.2	14.6	18.2	15.7	13.7	15.1	13.7	12.4	15.9
18.5	15.6	14.7	16.7	15.3	14.3	19.9	18	18.8	17.7	17.2	16	15.1	16.4
12.7	13.3	15.9	14.8	14.8	14.1	13.3	12.6	12.2	12.8	11.5	12.6	12.2	13.6
15	13.8	12.6	13.7	12.6	12	12.5	12.9	12.2	11	11.2	11.4	12.4	14
8.6	12.3	14.4	13.7	11.7	14.5	13.3	10.2	10.3	11.6	8.6	9.9	10.1	11.5
13	13	14.5	12.6	13.5	12.8	13.4	15.6	14.4	18.3	11.7	12.7	13.4	15.6
14.1	14.3	18.7	15.2	14.7	15.7	12.9	18.4	18.4	17.9	13.5	20.5	16.2	14.1
15.2	12.4	12	11.2	10.2	11.5	10.3	11.3	12.1	11.6	10.5	11.2	11.1	10.4
13	13.6	12.4	14.2	18.5	18.8	13.2	13.4	12.8	13.6	12.3	12.3	13.2	13.2
14.2	14.3	13.6	14.8	13.8	14.9	14.4	15.4	14.3	14.5	15.2	14.4	15.6	13.7
19.1	19.4	18	16.2	12	15.4	10.8	17.6	20.7	220	16.5	11.4	13.5	11.7
15.9	16.9	16	19.8	19.4	17.8	18.2	16.1	15.7	16.8	16.6	17.1	15.9	17.2
7.6	9.5	8.6	10.2	13.6	8.6	8.4	7.4	9.3	7.6	7.1	10.5	8.6	7.2
12.4	13	12.5	11.8	10.7	10.5	11	13.5	13.7	11.4	12.2	12.1	11.8	13.8
19.3	19.2	16.2	16.9	16.4	14.8	19	17	14.7	17.7	15.5	15.8	13.7	19.6
11	17	11.8	10.8	12.1	13.7	13.5	11.6	16.8	11	10.5	13.2	11.8	11.9
11.1	11.2	13.1	12.5	14.5	12.5	10.4	14.3	14.7	11.6	10	11	12.2	12
13.1	11.7	13	13.1	14.3	12.4	13.8	15	15	11.3	13.3	15.8	13.9	12
14.2	13.5	14.5	16.1	12.1	12.5	13.5	13.6	14.6	14.7	14.1	12	12.2	11.7
13.8	16.3	14.8	13.8	15.4	14.1	12.5	15	14	14.9	12.3	13.6	16	15.5
13.9	14	12.8	12.3	13.8	12	11.6	15.8	13.6	13.4	10.3	10.1	13.8	10.9
14	14.2	15.3	18.5	12.2	16.8	13.7	15.1	15.8	16.6	17.8	13.1	19.5	13.4
15	14.5	14.4	13.1	13.2	13.6	16.1	15.4	18.5	14.6	13.8	14.2	14.8	15.9
16.2	15.9	17.8	18.2	16.9	17.6	15.7	15.5	13.7	13.1	14.2	13.9	14.8	14.2
16.7	15.6	16.1	15.6	16.2	16.8	15.7	21.3	20.4	18.1	18.8	17.2	16.7	15.7
11.4	11.8	10.5	9.6	10.3	11.7	9.3	10.7	11	9.2	8.9	9.6	10.1	8.9

## Sheet: Hyperemia score 
R 0 min	R 15 min	R 30 min	R 60 min	R 120 min	R 180 min	R 360 min	L 0 min	L 15 min	L 30 min	L 60 min	L 120 min	L 180 min	L 360min
1	1.66667	2.33333	1.33333	1.33333	1.33333	1.33333	0.666667	2.66667	2.33333	2	1.33333	1.33333	1
0	1.33333	1.66667	1.66667	1.66667	0.333333	0	1	3	2.33333	1.66667	1.66667	1	1
0.666667	1	1	1	0.666667	1	1	0.666667	1.66667	1.66667	1	1	1	0.666667
0.333333	0	0.333333	1.33333	1	0.666667	0.333333	0.333333	2.33333	2.33333	1.66667	1.33333	0.666667	0.333333
0.333333	0.333333	0.666667	0.333333	0.333333	0.333333	0.333333	0.333333	2	2	1	0.333333	0.333333	0.333333
2.33333	3	3	2.66667	2.33333	2.33333	2.33333	2	2.66667	2.66667	2	2	2	1.66667
0.666667	0.666667	1	1	0.666667	1	1	0.333333	1.33333	1.66667	1	1	1	1
0	0.333333	0.333333	0.333333	0.333333	0.333333	0	0.666667	2.66667	2.66667	2	1.66667	1	1
1.33333	2	3	2	2	2	1.66667	1	3	3	2.66667	2	2	1.33333
0.666667	1	1	0.333333	0.666667	0.666667	0.666667	0.666667	0.666667	0.666667	0.666667	0.666667	0.666667	0.666667
0.666667	1.33333	1.33333	1	1	1.33333	1.33333	1	2	1.66667	1.33333	1.33333	1.33333	1.33333
1	1	1.33333	1.33333	1.33333	1.33333	1	1.33333	3	2.66667	1.66667	1.33333	1.33333	1.33333
1	2	2.33333	2.33333	1.66667	1.33333	1	1.33333	3	2.66667	2.33333	1.66667	1.33333	1.33333
1.33333	1.33333	2	1.33333	1.33333	1.33333	1.33333	1.33333	2.33333	2.33333	2	1.66667	1.66667	1.33333
0.333333	1.33333	1.66667	1.33333	1	0.666667	0.666667	0.333333	2.33333	2	1	0.666667	0.666667	0.666667
0.333333	1.33333	1.66667	1.33333	0.666667	0.666667	0.333333	0.333333	2	1.66667	1	0.333333	0.333333	0.333333
0.666667	1.33333	1.33333	0.666667	0.666667	0.666667	1	1.33333	2.66667	2.66667	2	1.66667	0.666667	0.666667
1.33333	2	2.33333	1.66667	1.66667	1.33333	1.66667	1.33333	3	2.66667	2	2	1.33333	1.33333
1	1	2.33333	2	1.33333	2	1.33333	1.33333	2	2.33333	2	2	2	1.33333
1	1.66667	1.33333	1.33333	1.33333	1.33333	1	1	2.33333	2	1.66667	1.33333	1.33333	1.33333
1.66667	1.66667	2	1.66667	1.33333	1.33333	1.33333	1.66667	2	2	1.33333	1.33333	1.33333	1.33333
0	1.33333	1.33333	1	1	0.333333	0.333333	0.333333	2.33333	2.33333	1.33333	0.666667	0.333333	0.333333
1	1	2	1.66667	1.33333	0.666667	0.333333	0.666667	2	2	1.66667	1.33333	1	0.666667
1.33333	1.66667	2	2	1.33333	1.33333	1.33333	1	2.33333	2	2	1	1	1
1	1.33333	1.33333	1.66667	1	1	1	1.66667	3	3	2.33333	2	1.33333	1.66667
1.33333	1.33333	2	1.66667	1.33333	1.33333	1.33333	1.33333	3	3	2.33333	1.66667	1.66667	1.66667
0.333333	0.333333	0.333333	0.333333	0	0	0.333333	0.333333	2	1.33333	1.33333	0.666667	0.333333	0.333333
0.666667	1.33333	1.33333	1.33333	1	1	0.666667	1.33333	3	2.66667	1.66667	1.33333	1.33333	1.33333
1.33333	2	2	1.66667	1.66667	1.66667	1.33333	1.33333	2.66667	2.66667	1.66667	1.33333	1.33333	1.33333
1.33333	2	2	2	1.66667	1.66667	1.66667	1.33333	3	2.66667	2	1.66667	1.66667	1.33333
0	1	1	0.666667	0.666667	0.666667	0.333333	1	2.33333	2.33333	2.33333	1.66667	1.66667	1
0.333333	1.33333	1.66667	1.66667	1.33333	1.33333	0.333333	0.666667	2.66667	2.66667	2	1.33333	1.33333	0.666667
0.333333	1	1	0.333333	0.333333	0.333333	0.333333	0.666667	3	2	1.33333	1.33333	1.33333	0.666667
0	1	1.33333	0.333333	0.333333	0.666667	0.333333	0.666667	2.33333	2.33333	1.33333	1	1	0.666667

## Sheet: CCT Pat
Patient no	Sex	Age	R 0 min	R 15 min	R 30 min	R 60 min	R 120 min	R 180 min	R 360 min	L 0 min	L 15 min	L 30 min	L 60 min	L 120 min	L 180 min	L 360min
1	F	29	0.522	0.524	0.524	0.524	0.518	0.52	0.512	0.524	0.527	0.531	0.525	0.518	0.516	0.516
2	M	27	0.549	0.546	0.545	0.545	0.544	0.54	0.541	0.546	0.547	0.546	0.543	0.538	0.536	0.54
3	M	44	0.545	0.542	0.546	0.546	0.535	0.543	0.542	0.532	0.537	0.534	0.533	0.53	0.531	0.535
4	F	23	0.535	0.535	0.534	0.533	0.532	0.536	0.531	0.531	0.531	0.531	0.53	0.527	0.529	0.524
5	F	32	0.528	0.533	0.53	0.532	0.531	0.531	0.527	0.533	0.539	0.538	0.536	0.531	0.528	0.529
6	M	28	0.579	0.583	0.584	0.579	0.581	0.58	0.575	0.583	0.585	0.582	0.574	0.569	0.568	0.577
7	F	29	0.566	0.568	0.566	0.564	0.562	0.561	0.56	0.573	0.571	0.572	0.567	0.559	0.558	0.558
8	F	27	0.537	0.538	0.539	0.536	0.535	0.535	0.533	0.541	0.545	0.542	0.539	0.533	0.534	0.534
9	M	34	0.544	0.542	0.541	0.539	0.536	0.535	0.532	0.54	0.542	0.541	0.536	0.532	0.529	0.53
10	F	24	0.561	0.565	0.564	0.562	0.563	0.561	0.56	0.554	0.557	0.558	0.557	0.553	0.553	0.554
11	F	32	0.556	0.557	0.556	0.555	0.553	0.554	0.554	0.556	0.554	0.553	0.546	0.546	0.547	0.547
12	F	32	0.504	0.508	0.506	0.501	0.504	0.5	0.496	0.495	0.5	0.508	0.507	0.493	0.491	0.493
13	M	36	0.567	0.567	0.568	0.563	0.566	0.567	0.561	0.565	0.569	0.565	0.565	0.561	0.559	0.557
14	F	26	0.522	0.52	0.519	0.518	0.521	0.517	0.516	0.52	0.52	0.516	0.514	0.51	0.505	0.509
15	F	39	0.551	0.553	0.552	0.554	0.552	0.554	0.544	0.548	0.549	0.55	0.549	0.543	0.541	0.536
16	F	37	0.577	0.575	0.574	0.575	0.574	0.572	0.573	0.579	0.577	0.575	0.57	0.565	0.564	0.571
17	M	34	0.551	0.551	0.549	0.547	0.545	0.541	0.544	0.552	0.553	0.553	0.548	0.543	0.541	0.544
18	M	27	0.494	0.489	0.488	0.488	0.486	0.483	0.478	0.499	0.493	0.49	0.486	0.479	0.482	0.477
19	F	27	0.572	0.569	0.568	0.566	0.568	0.567	0.566	0.574	0.574	0.575	0.571	0.568	0.566	0.564
20	M	24	0.512	0.512	0.514	0.512	0.51	0.51	0.506	0.514	0.517	0.513	0.51	0.508	0.506	0.508
21	F	26	0.548	0.548	0.55	0.547	0.547	0.544	0.542	0.544	0.546	0.547	0.544	0.539	0.535	0.537
22	M	29	0.594	0.596	0.594	0.595	0.593	0.593	0.59	0.604	0.606	0.603	0.601	0.596	0.598	0.598
23	F	26	0.576	0.576	0.577	0.575	0.574	0.573	0.575	0.574	0.578	0.576	0.571	0.568	0.566	0.57
24	F	24	0.556	0.551	0.55	0.545	0.545	0.547	0.54	0.55	0.551	0.546	0.546	0.538	0.537	0.537
25	F	23	0.463	0.463	0.461	0.462	0.461	0.462	0.461	0.46	0.465	0.463	0.462	0.454	0.453	0.455
26	F	35	0.492	0.496	0.499	0.502	0.499	0.497	0.495	0.493	0.506	0.499	0.5	0.49	0.488	0.491
27	F	27	0.487	0.482	0.485	0.484	0.482	0.482	0.479	0.486	0.488	0.49	0.489	0.482	0.48	0.481
28	F	34	0.538	0.539	0.539	0.541	0.538	0.536	0.533	0.541	0.543	0.541	0.54	0.533	0.533	0.535
29	M	48	0.545	0.544	0.543	0.544	0.539	0.542	0.539	0.537	0.538	0.537	0.533	0.527	0.524	0.527
30	M	29	0.542	0.545	0.542	0.541	0.542	0.541	0.534	0.536	0.542	0.539	0.533	0.532	0.533	0.531
31	F	24	0.511	0.509	0.51	0.509	0.507	0.508	0.507	0.508	0.51	0.516	0.51	0.51	0.504	0.504
32	F	24	0.541	0.539	0.541	0.541	0.539	0.539	0.541	0.536	0.54	0.542	0.54	0.535	0.533	0.54
33	F	27	0.627	0.624	0.624	0.626	0.624	0.625	0.617	0.617	0.618	0.617	0.614	0.607	0.608	0.604
34	M	24	0.503	0.501	0.504	0.501	0.497	0.494	0.496	0.504	0.507	0.505	0.5	0.494	0.496	0.495

## Sheet: Pixcel coverage
R 0 min	R 15 min	R 30 min	R 60 min	R 120 min	R 180 min	R 360 min	L 0 min	L 15 min	L 30 min	L 60 min	L 120 min	L 180 min	L 360min
5.9	16.6	15.1	12.5	12.7	12.6	6.5	9.2	18.8	14.5	16.3	15.9	11.6	9.5
9.1	16	13.3	13	12.7	11.8	8.5	8	11.7	11.7	10.2	8.8	7.4	7.5
7	7.8	14.1	8.9	10.9	7.9	9.3	8.6	12.3	15.4	12.6	7	8	7.5
5.9	16.6	15.1	12.5	12.7	12.6	6.5	9.2	18.8	14.5	16.3	15.9	11.6	9.5
9.7	7.5	9.3	8.2	7.8	6.8	7.9	9.1	18.1	13.2	9.4	7.4	8.7	6.9
16.4	22.1	23.4	20.1	20.9	20.3	18.5	12.4	20.1	21.1	19.8	18.3	18.5	14.9
6.9	5.5	7.6	7.5	7.2	7.5	5.4	5.4	9.7	8.5	8.1	7.4	6.5	5.4
8.5	7.4	7.6	6.5	6.7	7	7.3	12	15.6	13.9	10.3	9.5	8.5	9.5
9.6	16	16.4	10.2	11.7	10.2	11.1	12.9	19.7	15.1	16.6	16.5	13.1	13.5
4.8	6.2	8.2	5.8	5.6	4.8	6.1	8	7.3	9.8	6.7	5.5	6.4	6.2
7	9.4	9.3	10.5	7	7.3	6.9	7.3	14.4	9.4	11.2	11.2	7.7	7.7
6.8	6.8	7.6	6.7	6.1	5.9	4.7	7.9	14.8	15.3	10.3	8.9	9.1	9.7
13.5	19	19.1	19.3	11.6	7	9.5	9.8	18.2	15.5	15.4	11.7	10.2	11.6
9.3	8.1	11.1	10	10.4	9.1	9.8	11.8	19.1	17.3	15.6	16	14.3	9.1
9	10.2	12.5	9.3	7.7	7.8	7.4	6.5	12.3	15.4	8	7.8	8.6	7.2
15.1	17.8	17.5	16.5	17	13.7	12.9	10.7	16.1	14.3	13.6	11.8	11.5	8.2
11.4	11.1	12.7	12.7	10.1	9.9	8.8	17	22.1	17.2	14	12.9	10.1	8.4
9.1	15.2	13.3	12.2	11.7	10.1	11.9	9.5	15.5	12	11.4	11.1	10.6	10.3
9	12.9	12.8	12.2	12.2	11.6	11.2	10.4	12.7	14.2	9.6	11	10.4	10.2
8.7	14.1	11	9.4	8.9	8.6	8.6	7.2	12.5	13.5	10.4	9.7	9	10.1
11.3	11	14.5	13.7	13.6	11.1	11.2	13.5	12.7	14.1	12.3	9.8	10.8	11.9
7.6	8.1	8.6	9.4	7.4	6.4	8	8.6	15.6	13.6	11.7	11.1	9.8	9.5
11.1	12.4	11.5	10.7	10.3	9.5	10.9	8.1	10.9	11.8	6.4	7.3	7.2	8.3
10.1	10.8	9.4	10.6	10.4	8.9	7.5	8.2	14.3	14.3	13.9	9.4	12.5	10.9
7.3	7.3	7.3	7.3	7.3	7.3	7.3	8.2	19.6	16.7	13.3	12.7	11.9	10.2
11.2	10	9.3	10.4	10	9.4	10.6	10	16.7	13.7	13.8	11.1	9.2	10
5.4	6.7	6.5	4.9	5.2	6.1	6.3	6.8	14.6	12.9	11.1	11.6	10.3	8
9.2	11.7	11.6	10	11.1	9.2	8.4	11.6	16.8	14.6	16	15	14.5	13.1
12.4	13.1	11.3	10.6	11.8	11.5	10.4	9.9	14.7	14.2	11.1	11.4	11.9	8.6
10.6	12.7	11.6	13	12.2	10	10.5	8.5	17.4	13	11.9	9.6	9.3	8.7
8.1	12.6	12.5	11.1	10.3	9.7	8.1	8.2	11.4	13.5	11.1	8.9	11	8.5
5	7.3	8.9	8.8	8.2	7.7	7.2	10.6	15.3	13.5	9.4	11.7	9.5	11
10.6	11.4	12.3	11.4	11.9	7.8	7.5	9.5	17.7	16.6	11.7	12	9.8	10.7
8.1	12.6	12.5	11.1	10.3	9.7	8.1	8.2	11.4	13.5	11.1	8.9	11	8.5
